# Supplementary material
Source: MDPI journal article supplement (https://www.mdpi.com/2073-4395/12/11/2621)
Supplement: s1 [file s1 › agronomy-1932883-supplementary.pdf]

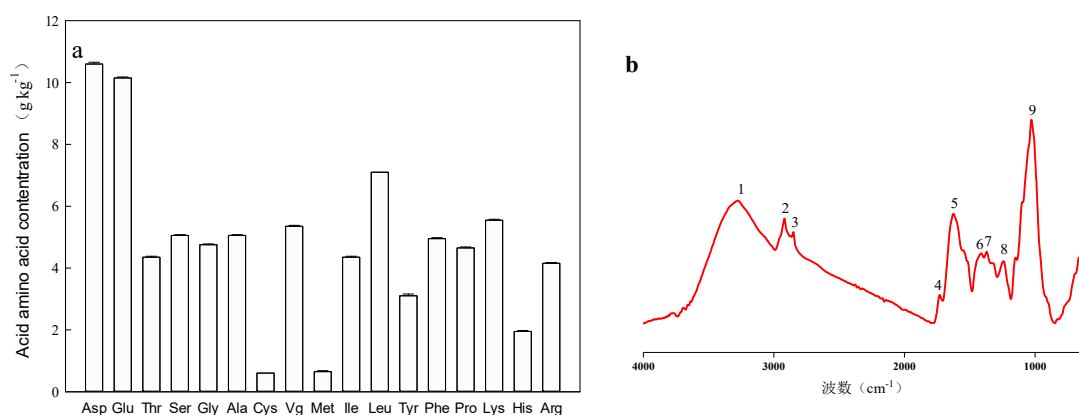

**Figure S1.** Acidolysis amino acids content (a) and infrared spectra (b) of the tested Chinese milk vetch.

The content of acid hydrolyzed amino acids in Chinese milk vetch(CMV) was 82.35 mg kg<sup>-1</sup>. In terms of acid-hydrolyzed amino acid composition, the contents of aspartic acid and glutamate in CMV were higher, which were 10.60 mg kg<sup>-1</sup> and 10.15 mg kg<sup>-1</sup>, respectively. There were 9 obvious absorption peaks in the infrared spectrum of CMV. Peak 1 appears at 3277 cm<sup>-1</sup>(N-H stretching vibration of amide functional groups and -OH of carbohydrates, carboxylic acids, phenols, etc.), peak 2 appears at 2719 cm<sup>-1</sup>(stretching vibration of -CH<sub>3</sub>, -CH<sub>2</sub> in aliphatic and alicyclic groups), peak 3 appears at 2851 cm<sup>-1</sup>(stretching vibration of -CH<sub>2</sub> in carbohydrate), peak 4 appears at 1730 cm<sup>-1</sup>(the C=O stretching vibration of the lipid carbonyl group in fatty acid compounds), peak 5 appears at 1625 cm<sup>-1</sup>(the C=O stretching vibration connected with aromatic ring and the C=O stretching vibration of amide compound in lignin, namely the amide I absorption band), peak 6 appears at 1413 cm<sup>-1</sup>(Lignin, aliphatic compounds and C-N stretching vibration, namely amide III absorption band), peak 7 appears at 1370 cm<sup>-1</sup>(the methyl group in lipids), peak 8 appears at 1242 cm<sup>-1</sup>(the C-O stretching vibrations in phenolic, cellulose esters and acetate compounds), peak 9 appears at 1028 cm<sup>-1</sup>(the Si-O stretching vibration, C-O stretching vibration, carbohydrate or polysaccharide).

**Table S1.** Concentration of amino acid standard.

| Amino acids            | Abbreviation | Molarity<br>umol mL <sup>-1</sup> | Wavelength<br>nm |
|------------------------|--------------|-----------------------------------|------------------|
| Phosphoserine          | Phser        | 0.5                               | 570              |
| Taurine                | Taur         | 0.5                               | 570              |
| Phosphoethanolamine    | Pea          | 0.5                               | 570              |
| Urease                 | urease       | 0.5                               | 570              |
| Aspartic acid          | Asp          | 0.5                               | 570              |
| Hydroxyproline         | Hypro        | 0.5                               | 440              |
| Threonine              | Thr          | 0.5                               | 570              |
| Serine                 | Ser          | 0.5                               | 570              |
| Asparagine             | Asn          | 0.5                               | 570              |
| Glutamate              | Glu          | 0.5                               | 570              |
| Sarcosine              | Sarc         | 0.5                               | 570              |
| a-aminoadipate         | Aaaa         | 0.5                               | 570              |
| Proline                | Pro          | 0.5                               | 440              |
| Glycine                | Gly          | 0.5                               | 570              |
| Alanine                | Ala          | 0.5                               | 570              |
| Citrulline             | Citr         | 0.5                               | 570              |
| a-aminobutyric acid    | Aaba         | 0.5                               | 570              |
| Valine                 | Val          | 0.5                               | 570              |
| Cystine                | Cys          | 0.25                              | 570              |
| Methionine             | Met          | 0.5                               | 570              |
| Cystathionine          | Cysth        | 0.5                               | 570              |
| Isoleucine             | Ile          | 0.5                               | 570              |
| Leucine                | Leu          | 0.5                               | 570              |
| Tyrosine               | Tyr          | 0.5                               | 570              |
| b-alanine              | Bala         | 0.5                               | 570              |
| Phenylalanine          | Phe          | 0.5                               | 570              |
| b-aminoisobutyric acid | Baiba        | 0.5                               | 570              |
| Homocysteine           | Homocys      | 0.5                               | 570              |
| g-aminobutyric acid    | Gaba         | 0.5                               | 570              |
| Ethanolamine           | Ethan        | 0.5                               | 570              |
| Ammonia                | Amm          | 0.5                               | 570              |
| Hydroxylysine          | Hylys        | 0.5                               | 570              |
| Ornithine              | Orn          | 0.5                               | 570              |
| Lysine                 | Lys          | 0.5                               | 570              |
| 1-methylhistidine      | 1-mhis       | 0.5                               | 570              |
| Histidine              | His          | 0.5                               | 570              |
| Tryptophan             | Trp          | 0.5                               | 570              |
| 3-methylhistidine      | 3-mhis       | 0.5                               | 570              |
| Anserine               | Ans          | 0.5                               | 570              |
| Carnosine              | Car          | 0.5                               | 570              |
| Arginine               | Arg          | 0.5                               | 570              |

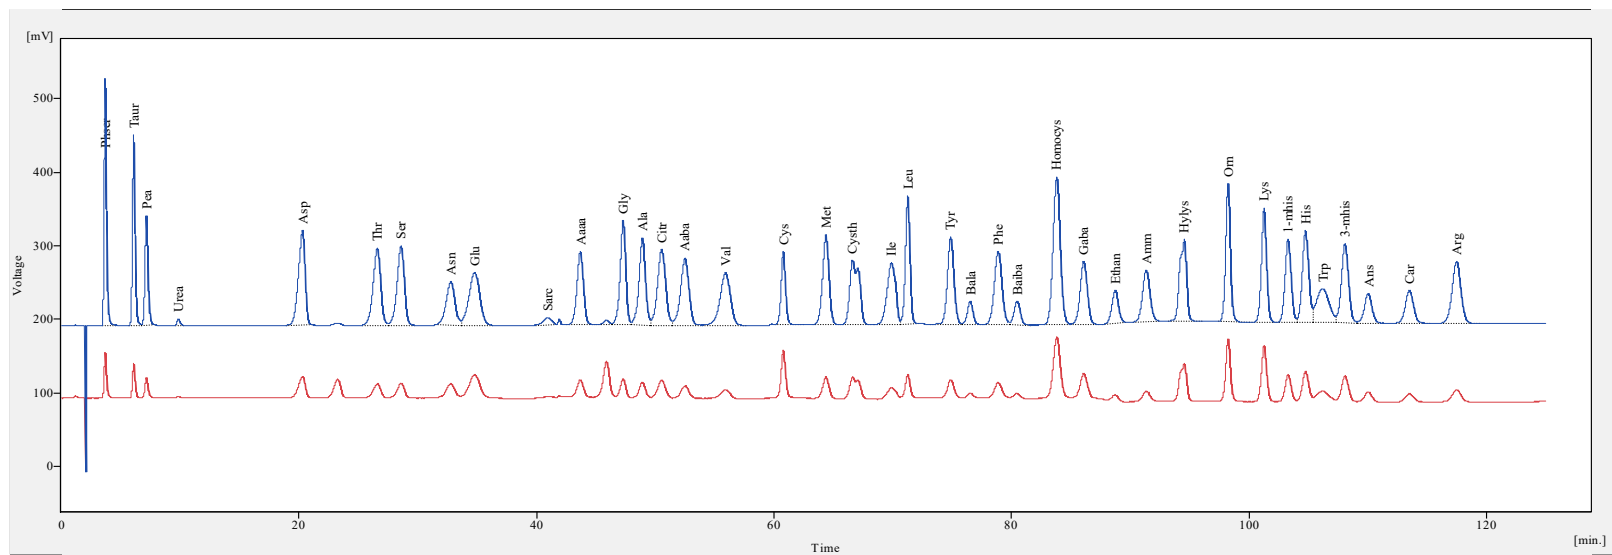

**Figure S2.** Standard spectrum of free amino acids.

### Performance of structural equation model

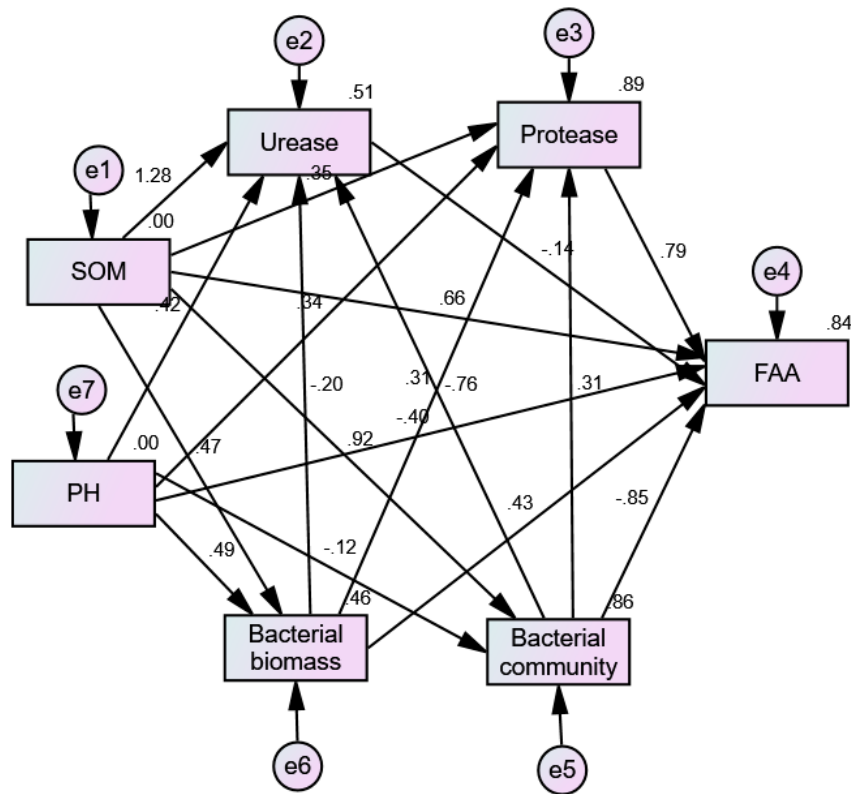

**Figure S3.** Conceptual model demonstrating the relationship between FAAs and its impact factors.

Some hypotheses could be made as follows:

- i) pH, SOM, protease, urease, MBN, bacterial biomass and bacterial community have a direct impact on FAAs
- ii) Bacterial biomass can have an indirect effect on FAAs through SOM, protease, urease
- iii) Bacterial community can have an indirect effect on FAAs through SOM, protease, urease
- iv) pH can have an indirect effect on FAAs through protease, urease, bacterial biomass, bacterial community
- v) SOM can have an indirect effect on FAAs through protease, urease, bacterial biomass, bacterial community

**Table S2.** Estimates of conceptual model coefficients for FAAs and its impact factors.

| Item                            | Estimate <sup>a)</sup> | S.E. <sup>b)</sup> | C.R. <sup>c)</sup> | P <sup>d)</sup> |
|---------------------------------|------------------------|--------------------|--------------------|-----------------|
| bacterial biomass<---SOM        | 10045610.972           | 2527473.198        | 3.975              | ***             |
| bacterial community<---SOM      | 0.971                  | 0.065              | 15.043             | ***             |
| bacterial biomass<---pH         | 133198688.758          | 31844847.118       | 4.183              | ***             |
| bacterial community<---pH       | -1.627                 | 0.814              | -2.000             | .045            |
| urease<---SOM                   | -.115                  | 0.060              | -1.917             | ***             |
| protease<---SOM                 | 0.698                  | 0.281              | 2.489              | 0.013           |
| urease<---pH                    | 0.141                  | 0.366              | 0.387              | 0.004           |
| protease<---pH                  | 8.550                  | 1.715              | 4.986              | ***             |
| urease<---bacterial biomass     | 0.000                  | 0.000              | -0.343             | 0.186           |
| protease<---bacterial biomass   | 0.000                  | 0.000              | 4.211              | ***             |
| urease<---bacterial community   | 0.089                  | 0.057              | 1.561              | 0.011           |
| protease<---bacterial community | 0.581                  | 0.268              | 2.172              | 0.030           |
| FAA<---SOM                      | 7.487                  | 2.689              | 2.784              | 0.001           |
| FAA<---pH                       | -73.565                | 18.498             | -3.977             | ***             |
| FAA<---bacterial biomass        | 0.000                  | 0.000              | 4.481              | ***             |
| FAA<---bacterial community      | -9.419                 | 2.429              | -3.878             | ***             |
| FAA<---urease                   | 2.987                  | 6.391              | 0.467              | 0.151           |
| FAA<---protease                 | 4.744                  | 1.363              | 3.481              | ***             |

*a): Non standardized regression coefficients of estimate.*

*b): Standard error of estimate.*

*c): critical ratio is the t values of T-test, C.R.>1.96 represents significant at 0.05 probability levels.*

*d): P value represents the significance level, \*\*\* significant at 0.001 probability levels, P > 0.05*

implied causal hypothetical pathways were false.

The release the path of  $P>0.05$ , delete urease to FAAs, bacterial biomass to urease, and get the modified model

**Table S3.** Estimates of modified model coefficients for FAAs and its impact factors.

| Item                            | Estimate <sup>a)</sup> | S.E. <sup>b)</sup> | C.R. <sup>c)</sup> | P <sup>d)</sup> |
|---------------------------------|------------------------|--------------------|--------------------|-----------------|
| bacterial biomass<---SOM        | 10045610.972           | 2527473.198        | 3.975              | ***             |
| bacterial community<---SOM      | 0.971                  | 0.065              | 15.043             | ***             |
| bacterial biomass<---pH         | 133198688.758          | 31844847.118       | 4.183              | ***             |
| bacterial community<---pH       | -1.627                 | 0.814              | -2.000             | 0.045           |
| protease<---SOM                 | 0.698                  | 0.281              | 2.489              | 0.013           |
| protease<---pH                  | 8.550                  | 1.715              | 4.986              | ***             |
| protease<---bacterial biomass   | 0.000                  | 0.000              | 4.211              | ***             |
| protease<---bacterial community | 0.581                  | 0.268              | 2.172              | 0.030           |
| FAA<---SOM                      | 7.080                  | 2.552              | 2.775              | 0.006           |
| FAA<---pH                       | -73.928                | 18.534             | -3.989             | ***             |
| FAA<---bacterial biomass        | 0.000                  | 0.000              | 4.446              | ***             |
| FAA<---bacterial community      | -9.207                 | 2.393              | -3.848             | ***             |
| FAA<---protease                 | 4.836                  | 1.352              | 3.576              | ***             |

**Table S4.** Fitting coefficients of the FAAs and its impact factors model.

| Indices name         | $\chi^2/df$ | RFI        | RMSEA | NFI        | TLI        | CFI        | IFI        |
|----------------------|-------------|------------|-------|------------|------------|------------|------------|
| Evaluation criterion | <3          | close to 1 | <0.05 | close to 1 | close to 1 | close to 1 | close to 1 |
| Results              | 0.500       | 0.971      | 0     | 0.996      | 1.031      | 1          | 1.004      |

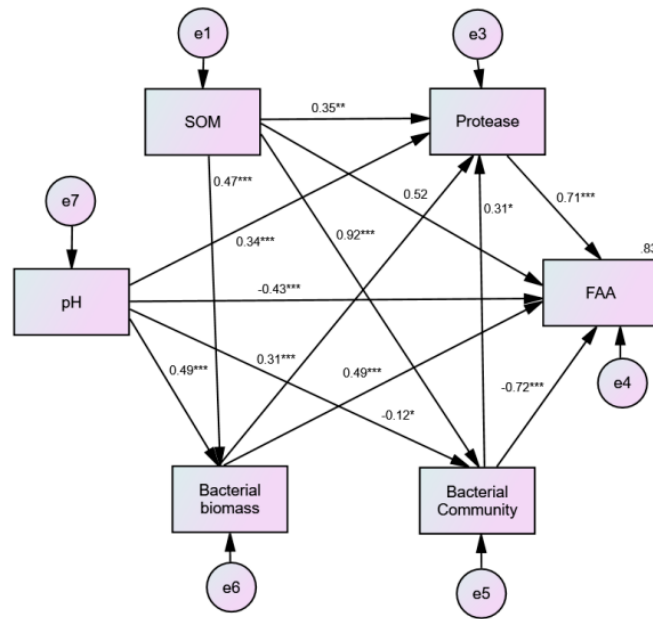

**Figure S4.** Modified model for FAAs and its impact factors.

**Table S5.** Total effects of factors contributing to the variability of FAAs content.

| Item                         | Direct Effects <sup>a)</sup> | Indirect Effects <sup>b)</sup> | Total Effects <sup>c)</sup> |
|------------------------------|------------------------------|--------------------------------|-----------------------------|
| FAA <--- pH                  | -0.43                        | 0.65                           | 0.22                        |
| FAA <--- SOM                 | 0.52                         | 0.12                           | 0.64                        |
| FAA <--- bacterial biomass   | 0.49                         | 0.22                           | 0.71                        |
| FAA <--- bacterial community | -0.72                        | 0.22                           | -0.50                       |
| FAA <--- protease            | 0.71                         | 0                              | 0.71                        |

Note: a): Standard path coefficients

b): The product of the direct effects path coefficients

c): The sum of direct effects and indirect effects

The absolute value of the path coefficient represents the size of the correlation, “-” represents a negative correlation
